# Supplementary material for: Corncob biochar combined with Bacillus subtilis to reduce Cd availability in low Cd-contaminated soil
Source: Royal Society of Chemistry journal article supplement (doi:10.1039/d2ra04643a), 2022-01-01
Supplement: d2ra04643a1.pdf [file d2ra04643a1.pdf]

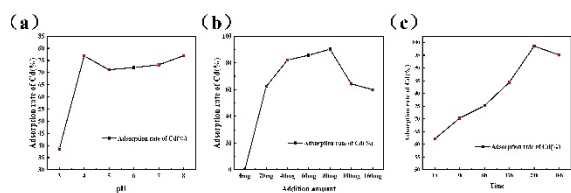

### Supporting information

**Fig. S1** Influences of pH, addition amount and reaction time during Cd adsorption of 400°C CB@B (400°C biochar with

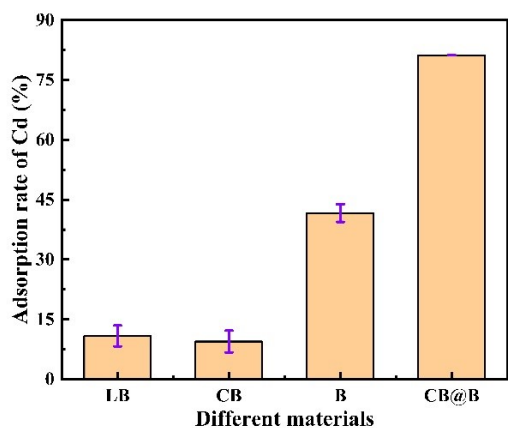

*Bacillus subtilis*)

**Fig. S2** Adsorption rate of Cd in water by different materials (B means *Bacillus subtilis*, LB means LB medium, CB@B

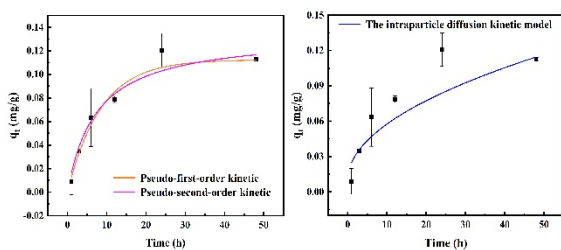

means 400°C corn cob biochar with *Bacillus subtilis*, CB means 400°C corn cob biochar)

**Fig. S3** The sorption kinetic models fitting parameters for Cd<sup>2+</sup> adsorption by 400°C corn cob biochar loaded *Bacillus subtilis* (400 °C CB@B)

**Table S1**

The heavy metals content of the 400 °C corncob biochar. (unit: mg kg<sup>-1</sup>)

| Corn cob biochar | Cd   | Cr   | Cu   | Pb   | As   |
|------------------|------|------|------|------|------|
| XRF              | <0.3 | 60.3 | 6.24 | <1.3 | <0.4 |
| Measured value   | 0.29 | —    | —    | —    | —    |

**Table S2**

The contents of heavy metals and physicochemical properties in tested soil. (mg kg<sup>-1</sup>)

| Tested Soil    | Cd      | Cr         | Pb       | As       | pH      | Avail    | Avail      |
|----------------|---------|------------|----------|----------|---------|----------|------------|
|                |         |            |          |          |         | nitrogen | phosphorus |
| XRF            | 1.3±0.3 | 128.6±19.9 | 48.2±1.2 | 10.8±0.5 | —       | —        | —          |
| Measured value | 1.4±0.2 | —          | —        | —        | 7.2±0.2 | 25.69    | 4.00       |

**Table S3**

The intraparticle diffusion, the pseudo-first-order and pseudo-second-order models fitting parameters for Cd<sup>2+</sup> adsorption by 400 °C CB@B (400°C biochar with *B. subtilis*).

| Model                   | Parameter 1          | Parameter 2          | Parameter 3           |
|-------------------------|----------------------|----------------------|-----------------------|
| Pseudo-first-order      | q <sub>e</sub> =0.12 | K <sub>1</sub> =0.11 | R <sup>2</sup> =0.995 |
| Pseudo second-order     | q <sub>e</sub> =0.13 | K <sub>2</sub> =1.01 | R <sup>2</sup> =0.986 |
| Intraparticle diffusion | C <sub>1</sub> =0.01 | K <sub>f</sub> =0.01 | R <sup>2</sup> =0.969 |

The digestion experiment was performed according to the Chinese standard HJ 832-2017 (Soil and sediment – Digestion of total metal elements – Microwave assisted acid digestion method). Specifically, 0.25 g of the ground sample was placed in a crucible, and 2 mL HClO<sub>4</sub>, 3 mL HNO<sub>3</sub>, and 8 mL HF were added. The crucible was heated to 120 °C until the brown color disappeared. After the mixture was dried, the above acids were added, and the mixture was heated again. The mixture was dried again, and the crucible was cleaned with HClO<sub>4</sub> until the residual was completely digested and dried. Then, 2 mL HNO<sub>3</sub> with a water/HNO<sub>3</sub> ratio of 1:1 and 5% HNO<sub>3</sub> were added to the crucible until the sample was completely digested, which was indicated by the solution becoming transparent. Cd was measured using inductively coupled plasma optical emission spectroscopy (ICP-OES, Optima, 2000; PerkinElmer Co., USA).

Tessier's method contains five steps, as listed below.

- (1) Exchangeable Cd is extracted by  $\text{MgCl}_2$  ( $1 \text{ mol L}^{-1}$ ).
- (2) Carbonate-bound Cd is extracted by  $\text{CH}_3\text{COONa}$  ( $1 \text{ mol L}^{-1}$ ).
- (3) Fe–Mn oxide-bound Cd is extracted by  $\text{NH}_2\text{OH}\cdot\text{HCl}$  ( $0.04 \text{ mol L}^{-1}$ ).
- (4) Organic Cd is extracted by  $\text{HNO}_3$  ( $0.02 \text{ mol}\cdot\text{L}^{-1}$ ) and 6 mL 30%  $\text{H}_2\text{O}_2$ .
- (5) Residual Cd is calculated by subtracting the sum of the first four steps from the difference of the total amount extracted.
